# Supplementary material for: Overview of the effect of monomers and green solvents on thermoresponsive copolymers: phase transition temperature and surface properties
Source: Royal Society of Chemistry journal article supplement (doi:10.1039/c5ra18246h), 2015-01-01
Supplement: c5ra18246h1.pdf [file c5ra18246h1.pdf]

*Supporting Information for*

**Overview of the effect of monomers and green solvents on thermoresponsive copolymers: phase transition temperature and surface properties**

**P. Madhusudhana Reddy<sup>1, ‡</sup>, Chi-Jung Chang<sup>\*,1</sup>, Shih-Rong Hsieh<sup>2, ‡</sup>, Hsin-Chun Huang<sup>1</sup>, Ming-Ching Lee<sup>2</sup>**

<sup>1</sup>Department of Chemical Engineering, Feng Chia University, 100, Wenhwa Road, Seatwen, Taichung 40724, Taiwan ROC

<sup>2</sup>Department of Surgery, Taichung Veterans General Hospital, 1650 Taiwan Boulevard Sect. 4, Taichung 40705, Taiwan ROC.

Correspondence to: Chi-Jung Chang (E-mail: changcj@fcu.edu.tw)

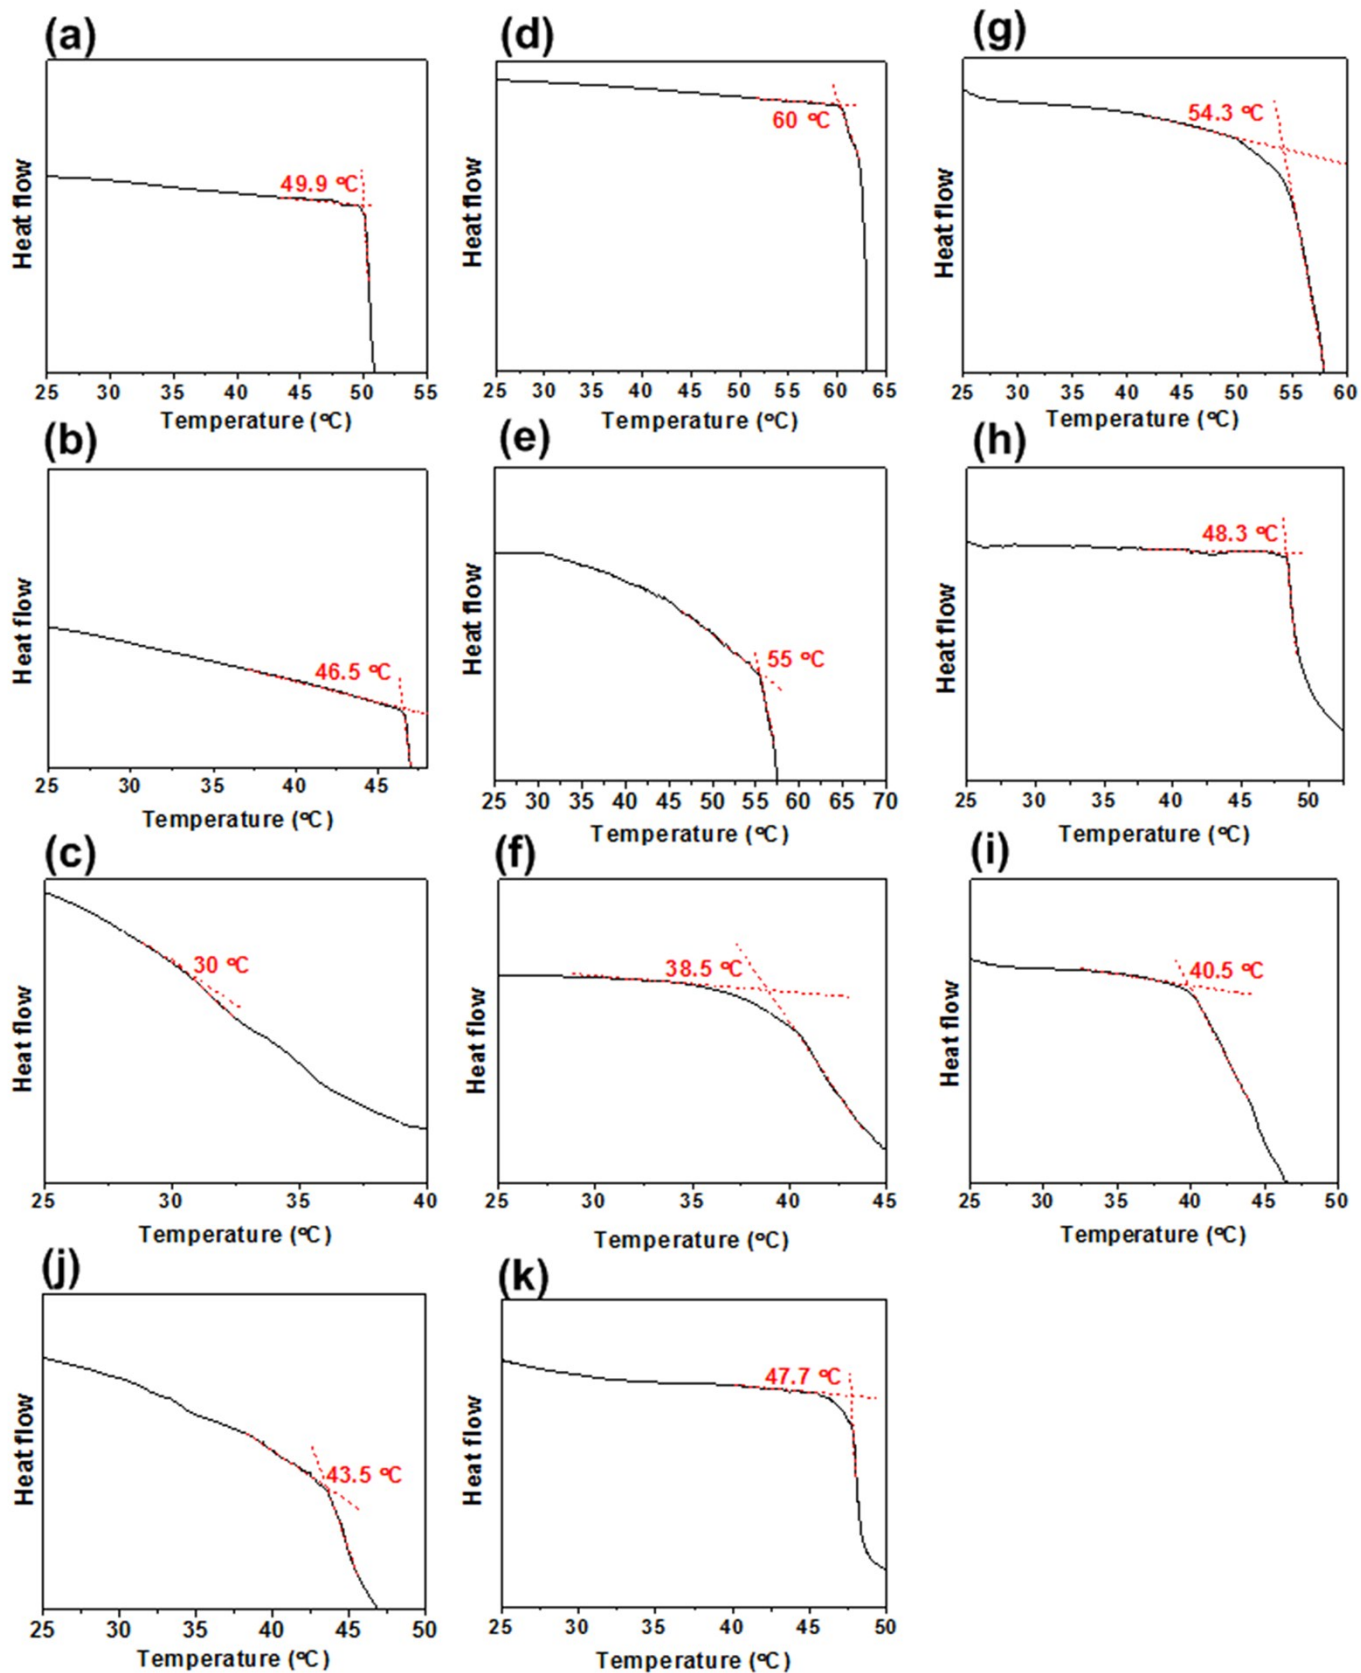

**FIGURE S1.** DSC thermograms for the polymeric hydrogels in water in the presence of ionic liquids: (a), (b), and (c) represent P(NIPAM-co-AA) in water in the presence of [Bmim][BF<sub>4</sub>], [Bmim][Cl] and [Bmim][HSO<sub>4</sub>], respectively; (d), (e) and (e) represent P(NIPAM-co-PEGMA-co-AA)-4 in water in the presence of [Bmim][BF<sub>4</sub>], [Bmim][Cl] and [Bmim][HSO<sub>4</sub>], respectively; (f), (g) and (h) represent P(NIPAM-co-PEGMA-co-AA)-7 in water in the presence of [Bmim][BF<sub>4</sub>], [Bmim][Cl] and [Bmim][HSO<sub>4</sub>], respectively; (i) and (j) represent P(NIPAM-co-PEGMA) in water in the presence of [Bmim][BF<sub>4</sub>] and [Bmim][Cl], respectively. Concentration of ionic liquids is 0.5 M.
